# Supplementary material for: Hypersensitivity reactions to contrast media: Part 1. Management of immediate and non-immediate hypersensitivity reactions in adults. Updated guidelines by the ESUR Contrast Media Safety Committee
Source: Springer Nature journal article supplement (doi:10.1007/s00330-025-11675-1), 2025-05-27
Supplement: MOESM1 [file 330_2025_11675_MOESM1_ESM.pdf]

# Hypersensitivity Reactions to Contrast Media: Part 1. Management of Immediate and Non-immediate Hypersensitivity Reactions in Adults. Updated ESUR Contrast Media Safety Committee Guidelines

## ELECTRONIC SUPPLEMENTARY MATERIAL

### Online Supplement 1: Original Literature Searches

#### Literature Search IHR

| Database                     | Search String                                                                                                                                                                                                                                                                                                                                                                                                                                                                                                                                                                                                                                                                                                                                                                                                                                                                                                                                                                                                                                                                                                                                                        |
|------------------------------|----------------------------------------------------------------------------------------------------------------------------------------------------------------------------------------------------------------------------------------------------------------------------------------------------------------------------------------------------------------------------------------------------------------------------------------------------------------------------------------------------------------------------------------------------------------------------------------------------------------------------------------------------------------------------------------------------------------------------------------------------------------------------------------------------------------------------------------------------------------------------------------------------------------------------------------------------------------------------------------------------------------------------------------------------------------------------------------------------------------------------------------------------------------------|
| PubMed<br>1985 –<br>May 2022 | <p>("Contrast Media"[Mesh] OR contrast medi* [tiab] OR contrast agent* [tiab] OR contrast material* [tiab] OR contrast dose [tiab] OR contrast doses [tiab] OR contrast dosage [tiab] OR radiocontrast medi* [tiab] OR radiocontrast agent* [tiab] OR radiopaque medi* [tiab] OR radiocontrast dose [tiab] OR radiocontrast doses [tiab] OR radiocontrast dosage [tiab] OR "Barium"[Mesh] OR barium [tiab] OR gadolinium [tiab] OR microbubble* [tiab])</p> <p>AND (("Drug Hypersensitivity"[Mesh] OR hypersensitiv* [tiab] OR allergic* [tiab] OR anaphylaxis [tiab] OR anaphylact* [tiab] OR adverse reaction* [tiab] OR urticaria* [tiab] OR diffuse erythema [tiab] OR facial edema [tiab] OR angioedema [tiab] OR bronchospasm* [tiab] OR laryngeal edema [tiab] OR anaphylactic shock [tiab] OR hypotension [tiab] OR pulmonary edema [tiab] OR cardiac arrest [tiab] OR respiratory arrest [tiab]) AND (acute [tiab] OR after administration [tiab] OR rapid* [tiab] OR severe [tiab]))</p> <p>AND (treatment [tiab] OR treat [tiab] OR recommend* [tiab])</p> <p>AND ("english"[Language]) AND ("1985"[Date - Publication] : "3000"[Date - Publication])</p> |
| Embase<br>(Elsevier)         | <p>contrast medium'/exp/mj OR (((contrast OR radiocontrast) NEAR/2 (medi* OR agent* OR material* OR dose OR doses OR dosage)):ab,ti) OR 'radiopaque medi*':ab,ti OR 'barium'/exp/mj OR barium:ab,ti OR 'gadolinium'/exp/mj OR gadolinium:ab,ti OR 'microbubble'/exp/mj OR microbubble*:ab,ti)</p> <p>AND (('hypersensitivity'/exp OR hypersensitiv*:ab,ti OR allergic*:ab,ti OR anaphylaxis:ab,ti OR anaphylactic:ab,ti OR 'adverse reaction*':ab,ti OR urticaria*:ab,ti OR 'diffuse erythema':ab,ti OR 'facial edema':ab,ti OR angioedema:ab,ti OR bronchospasm:ab,ti OR 'laryngeal edema':ab,ti OR 'anaphylactic shock':ab,ti OR hypotension:ab,ti OR 'pulmonary edema':ab,ti OR 'cardiac arrest':ab,ti OR 'respiratory arrest':ab,ti) AND (acute:ab,ti OR 'after administration':ab,ti OR rapid*:ab,ti OR severe:ab,ti))</p> <p>AND (treatment:ab,ti OR treat:ab,ti OR recommend*:ab,ti))</p> <p>AND [english]/lim AND [1985-2018]/py</p> <p>NOT 'conference abstract':it NOT (('animal experiment'/exp OR 'animal model'/exp OR 'nonhuman'/exp) NOT 'human'/exp)</p>                                                                                             |

Literature Search NIHR

| Database                     | Search string                                                                                                                                                                                                                                                                                                                                                                                                                                                                                                                                                                                                                                                                                                                                                                                                                                                                                                                                                                                                                                                                                                                                                                                                                       |
|------------------------------|-------------------------------------------------------------------------------------------------------------------------------------------------------------------------------------------------------------------------------------------------------------------------------------------------------------------------------------------------------------------------------------------------------------------------------------------------------------------------------------------------------------------------------------------------------------------------------------------------------------------------------------------------------------------------------------------------------------------------------------------------------------------------------------------------------------------------------------------------------------------------------------------------------------------------------------------------------------------------------------------------------------------------------------------------------------------------------------------------------------------------------------------------------------------------------------------------------------------------------------|
| PubMed<br>1985 –<br>May 2022 | <p>(((((("Contrast Media"[Mesh] OR contrast medi* [ti] OR contrast agent* [ti] OR contrast material* [ti] OR contrast dose [ti] OR contrast doses [ti] OR contrast dosage [ti] OR radiocontrast medi* [ti] OR radiocontrast agent* [ti] OR radiopaque medi* [ti] OR radiocontrast dose [ti] OR radiocontrast doses [ti] OR radiocontrast dosage [ti] OR "Barium"[Mesh] OR barium [tiab] OR gadolinium [tiab] OR microbubble* [tiab])))</p> <p>AND (((("Drug Hypersensitivity"[Mesh] OR hypersensitiv* [tiab] OR allerg* [tiab] OR anaphylax* [tiab] OR anaphylact* [tiab] OR "Exanthema"[Mesh] OR exanthem* [tiab] OR rash [tiab] OR adverse reaction* [tiab] OR urticaria* [tiab] OR erythem* [tiab] OR hypotension [tiab] OR hypertension [tiab] OR "Stevens-Johnson Syndrome"[Mesh] OR stevens johnson syndrome [tiab] OR sjs [tiab] OR toxic epidermal necrolysis* [tiab] OR "Drug Hypersensitivity Syndrome"[Mesh] OR dress syndrome [tiab] OR iodide mump* [tiab]) AND (late [tiab] OR delayed [tiab] OR nonimmediate [tiab])) OR late reaction* [tiab] OR delayed reaction* [tiab] OR nonimmediate reaction* [tiab])))</p> <p>AND (("english"[Language]) AND ("1985"[Date - Publication] : "3000"[Date - Publication])))</p> |
| Embase<br>(Elsevier)         | <p>((('contrast medium'/exp/mj OR (((contrast OR radiocontrast) NEAR/2 (medi* OR agent* OR material* OR dose OR doses OR dosage)):ti) OR 'radiopaque medi*':ab,ti OR 'barium'/exp/mj OR barium:ab,ti OR 'gadolinium'/exp/mj OR gadolinium:ab,ti OR 'microbubble'/exp/mj OR microbubble*:ab,ti)</p> <p>AND (('hypersensitivity'/exp OR hypersensitiv*:ab,ti OR anaphylax*:ab,ti OR allerg*:ab,ti OR 'rash'/exp OR rash:ab,ti OR 'adverse reaction*':ab,ti OR hypotension:ab,ti OR hypertension:ab,ti OR urticaria*:ab,ti OR erythem*:ab,ti OR exanthem*:ab,ti OR 'stevens johnson syndrome'/exp OR 'stevens johnson syndrome':ab,ti OR sjs:ab,ti OR 'toxic epidermal necrolysis'/exp OR 'toxic epidermal necrolysis*':ab,ti OR 'dress syndrome'/exp OR 'dress syndrome':ab,ti OR 'iodide mump*':ab,ti) AND (late:ab,ti OR delayed:ab,ti OR nonimmediate:ab,ti) OR (((late OR delayed OR nonimmediate) NEAR/2 reaction*):ab,ti)))</p> <p>AND [english]/lim AND [1985-2022]/py</p> <p>NOT 'conference abstract':it NOT (('animal experiment'/exp OR 'animal model'/exp OR 'nonhuman'/exp) NOT 'human'/exp)</p>                                                                                                                         |

## Online Supplement 2

Relevant studies with risk factor analyses for hypersensitivity and adverse drug reactions to iodine-based contrast media (sorted by year)

| <b>Author, Year<br/>Type of<br/>Reactions</b> | <b>Origin</b> | <b>Route of CM<br/>Administratio<br/>n</b> | <b>Cases</b>                                      | <b>Controls</b> | <b>Risk Factor</b>                   | <b>Frequency (%) /<br/>Odds Ratio (adj)</b> |
|-----------------------------------------------|---------------|--------------------------------------------|---------------------------------------------------|-----------------|--------------------------------------|---------------------------------------------|
| <b>Hypersensitivity Reactions</b>             |               |                                            |                                                   |                 |                                      |                                             |
| Fukushima, 2023<br><i>Severe IHR</i>          | R             | IV<br>(CT)                                 | 45 (0,16%)<br><i>4 premedication</i>              | No<br>controls  | Iomeprol vs Iopamidol                | OR 6,8                                      |
| McDonald, 2023<br><i>All HR</i>               | R             | IV<br>(CT)                                 | 1,150 (0,32%)                                     | No<br>controls  | Age < 50 years (highest 21-30 years) | OR 1,68-2,26                                |
|                                               |               |                                            |                                                   |                 | Female sex                           | OR 1,49                                     |
|                                               |               |                                            |                                                   |                 | Non-white race                       | OR 1,77                                     |
|                                               |               |                                            |                                                   |                 | Prior HR to ICM                      | OR 27,6                                     |
|                                               |               |                                            |                                                   |                 | Prior HR to GBCA                     | OR 1,91                                     |
|                                               |               |                                            |                                                   |                 | Asthma (only moderate-severe HR)     | OR 1,45                                     |
|                                               |               |                                            |                                                   |                 | History of other allergies           | OR 1,21                                     |
|                                               |               |                                            |                                                   |                 | Iopromide vs Iohexol                 | OR 3,07                                     |
| Voltolini, 2022<br><i>All HR</i>              | A             | Data not<br>included                       | 407<br><i>400 skin tests<br/>78 premedication</i> | 152             | First ICM exposure                   | OR 2,84                                     |
|                                               |               |                                            |                                                   |                 | Cardiovascular diseases              | OR 2,06                                     |
|                                               |               |                                            |                                                   |                 | History of respiratory allergy       | OR 2,30                                     |
|                                               |               |                                            |                                                   |                 | History of adverse drug reaction     | OR 1,99                                     |
| Cha, 2019<br><i>All HR</i>                    | R             | Data not<br>included                       | 1,433 (0,73%)<br><i>541 premedication</i>         | 1,433           | Iomeprol                             | 0,95%                                       |
|                                               |               |                                            |                                                   |                 | Iobitridol                           | 0,89%                                       |
|                                               |               |                                            |                                                   |                 | Prior HR to ICM                      | OR 198,8                                    |
|                                               |               |                                            |                                                   |                 | Hyperthyroidism                      | OR 3,6                                      |
|                                               |               |                                            |                                                   |                 | History of drug allergy              | OR 3,5                                      |
| History of other allergic diseases            | OR 6,8        |                                            |                                                   |                 |                                      |                                             |

|                                                        |   |                      |                                                                          |                |                                     |          |
|--------------------------------------------------------|---|----------------------|--------------------------------------------------------------------------|----------------|-------------------------------------|----------|
|                                                        |   |                      |                                                                          |                | Family history of HR to ICM         | OR 14,0  |
| Lee, 2019<br><i>Immediate HR</i>                       | A | IV<br>(CT)           | 2004 (0,97%)                                                             | No<br>controls | Prior HR to ICM                     | OR 40,69 |
|                                                        |   |                      |                                                                          |                | Age below 50 years                  | OR 2,11  |
|                                                        |   |                      |                                                                          |                | Presence of asthma                  | OR 1,47  |
|                                                        |   |                      |                                                                          |                | Female sex                          | OR 1,29  |
|                                                        |   |                      |                                                                          |                | Comorbid allergic disease           | 2,6%     |
|                                                        |   |                      |                                                                          |                | Patients with chronic liver disease | 3,1%     |
|                                                        |   |                      |                                                                          |                | Patients with cancer                | 2,1%     |
| <b>Adverse Drug Reactions</b>                          |   |                      |                                                                          |                |                                     |          |
| Zeng, 2024<br><i>All ADR</i>                           | R | IV<br>(CT)           | 522 (0,11%)<br><i>Acute 469<br/>(0,099%)<br/>Delayed 53<br/>(0,011%)</i> | 522            | Season: summer                      | OR 1,579 |
|                                                        |   |                      |                                                                          |                | Season: autumn                      | OR 1,925 |
|                                                        |   |                      |                                                                          |                | Female sex                          | 0,141%   |
|                                                        |   |                      |                                                                          |                | Age 21-30 years                     | 0,241%   |
|                                                        |   |                      |                                                                          |                | Iopromide 370 mg/ml (acute ADR)     | 0,218%   |
|                                                        |   |                      |                                                                          |                | Iodixanol 320 mg/ml (delayed ADR)   | 0,039%   |
| Chatani, 2023<br><i>All ADR<br/>(First visit only)</i> | R | Data not<br>included | 163 (0,72%)                                                              | No<br>controls | History of asthma                   | OR 17,4  |
|                                                        |   |                      |                                                                          |                | History of drug allergy             | OR 2,4   |
|                                                        |   |                      |                                                                          |                | Outpatients                         | OR 2,1   |
|                                                        |   |                      |                                                                          |                | Use of premedication                | OR 3,7   |
| Kang, 2022<br><i>Delayed ADR</i>                       | R | IV<br>(CT)           | 207 (2,0%)                                                               | 7,260          | Female sex                          | OR 1,51  |
|                                                        |   |                      |                                                                          |                | History of drug allergy             | OR 4,59  |
|                                                        |   |                      |                                                                          |                | History of allergy                  | OR 2,54  |
| Li, 2017<br><i>All ADR</i>                             | R | IV<br>(CT)           | 506 (0,42%)                                                              | No<br>controls | Female sex                          | 0,46%    |
|                                                        |   |                      |                                                                          |                | Prior HR to ICM                     | 7,17%    |
|                                                        |   |                      |                                                                          |                | Age 20-29 years                     | 0,74%    |
|                                                        |   |                      |                                                                          |                | ICM dose > 100ml                    | 0,60%    |
|                                                        |   |                      |                                                                          |                | ICM injection speed > 5ml/s         | 0,57%    |
|                                                        |   |                      |                                                                          |                | BMI > 24                            | 0,47%    |
|                                                        |   |                      |                                                                          |                | IOCM use                            | 0,69%    |

|                                   |   |            |                           |                |                             |        |
|-----------------------------------|---|------------|---------------------------|----------------|-----------------------------|--------|
|                                   |   |            |                           |                | Patients with asthma        | 2,04%  |
|                                   |   |            |                           |                | Patients with heart failure | 1,10%  |
|                                   |   |            |                           |                | Patients with gout          | 0,70%  |
| Kobayashi, 2013<br><i>All ADR</i> | R | IV<br>(CT) | Derivation:<br>409 (2,0%) | No<br>controls | Prior HR to CM              | OR 7,1 |
|                                   |   |            |                           |                | Urticaria                   | OR 2,7 |
|                                   |   |            |                           |                | Allergy to other drugs      | OR 1,9 |
|                                   |   |            |                           |                | ICM concentration >70%      | OR 1,9 |
|                                   |   |            |                           |                | Age < 50 years              | OR 1,8 |
|                                   |   |            |                           |                | CM Iodine dose >65g         | OR 1,4 |

**Abbreviations:**

*A = Allergology; ADR = adverse drug reactions; BMI = body mass index; CM = Contrast Media; CT = computed tomography; HR = hypersensitivity reactions; GBCA = gadolinium-based contrast agent; ICM = iodine-based contrast medium; IOCM = iso-osmolar contrast medium; IV = intravenous; OR = Odds Ratio; R = Radiology*

## References

### Hypersensitivity Reactions

Fukushima Y, Taketomi-Takahashi A, Suto T, Hirasawa H, Tsushima Y (2023) Clinical features and risk factors of iodinated contrast media (ICM)-induced anaphylaxis. *Eur J Radiol* 164:110880.

McDonald JS, Larson NB, Schmitz JJ, et al (2023) Acute adverse events after iodinated contrast agent administration of 359,977 injections: a single-center retrospective study. *Mayo Clin Proc* 98: 1820-1830. DOI: 10.1016/j.mayocp.2023.02.032.

Voltolini S, Cofini V, Murzilli F, et al (2022) Hypersensitivity reactions to iodinate contrast media in Italy: a retrospective study. Characteristics of patients and risk factors. *Eur Ann Allergy Clin Immunol* 54: 60-67. DOI: 10.23822/EurAnnACI.1764-1489.225.

Cha MJ, Kang DY, Lee W, et al (2019) Hypersensitivity reactions to iodinated contrast media: a multicenter study of 196,081 patients. *Radiology* 293: 117-124. DOI: 10.1148/radiol.2019190485.

Lee SY, Kang DY, Kim JY, et al (2019) Incidence and risk factors of immediate hypersensitivity reactions associated with low-osmolar iodinated contrast media: a longitudinal study based on a real-time monitoring system. *J Investig Allergol Clin Immunol* 29: 444-450. DOI 10.18176/jiaci.0374.

### Adverse Drug Reactions

Zeng W, Tang J, Xu X, et al (2024) Safety of non-ionic contrast media in CT examinations for out-patients: retrospective multicenter analysis of 473,482 patients. *Eur Radiol* 34: 5570-5577. DOI: 10.1007/s00330-024-10654-2.

Chatani R, Kondo S, Kamimura T, et al (2023) Exploring factors affecting the occurrence of hypersensitivity reactions induced by nonionic iodine contrast media. *J Clin Pharmacol* 63: 1002-1008. DOI: 10.1002/jcph.2256.

Kang DY, Lee SY, Ahn YH, et al (2022) Incidence and risk factors of late adverse reactions to low-osmolar contrast media: A prospective observational study of 10,540 exposures. *Eur J Radiol* 146: 110101. DOI: 10.1016/j.ejrad.2021.110101.

Li X, Liu H, Zhao L, et al (2017) Clinical observation of adverse drug reactions to non-ionic iodinated contrast media in population with underlying diseases and risk factors. *Br J Radiol* 90(1070): 20160729. DOI: 10.1259/bjr.20160729.

Kobayashi D, Takahashi O, Ueda T, Deshpande GA, Arioka H, Fukui T (2013) Risk factors for adverse reactions from contrast agents for computed tomography. *BMC Med Inform Decis Mak* 13: 18. DOI: 10.1186/1472-6947-13-18.

*Eur Radiol* (2025) van der Molen AJ, van de Ven AAJM, Vega F, et al.

### Online Supplement 3

Relevant studies with risk factor analyses for hypersensitivity and adverse drug reactions to gadolinium-based contrast agents (sorted by year)

| <b>Author, Year<br/>Type of<br/>Reactions</b> | <b>Origin</b> | <b>Route of CM<br/>Administration</b> | <b>Cases</b>                                                                    | <b>Controls</b> | <b>Risk Factor</b>                | <b>Frequency (%) /<br/>Odds Ratio<br/>(adj)</b> |
|-----------------------------------------------|---------------|---------------------------------------|---------------------------------------------------------------------------------|-----------------|-----------------------------------|-------------------------------------------------|
| <b>Hypersensitivity Reactions</b>             |               |                                       |                                                                                 |                 |                                   |                                                 |
| Fukushima, 2024<br><i>Immediate HR</i>        | R             | IV<br>(MRI)                           | First 67 (0,16%)<br>Repeat 8 (1,9%)<br>240 of previous HR<br>with premedication | No<br>controls  | Gadoxetate                        | OR 8,03                                         |
|                                               |               |                                       |                                                                                 |                 | Gadoteridol                       | OR 4,93                                         |
|                                               |               |                                       |                                                                                 |                 | Gadopentetate                     | OR 3,27                                         |
|                                               |               |                                       |                                                                                 |                 | Younger age                       | OR 0,99                                         |
|                                               |               |                                       |                                                                                 |                 | Previous HR to GBCA               | 1,9%                                            |
|                                               |               |                                       |                                                                                 |                 | Gadobutrol (repeat HR)            | 6,4%                                            |
| Ahn, 2022<br><i>All HR</i>                    | R             | IV<br>(MRI)                           | 1,304 (0,4%)                                                                    | No<br>controls  | Prior HR to ICM                   | OR 4,6                                          |
|                                               |               |                                       |                                                                                 |                 | Gadoteridol                       | 0,8%                                            |
| McDonald, 2019<br><i>All HR</i>               | R             | IV<br>(MRI)                           | 442 (0,16%)                                                                     | No<br>controls  | Gadobenate                        | OR 3,9                                          |
|                                               |               |                                       |                                                                                 |                 | Gadobutrol                        | OR 2,3                                          |
|                                               |               |                                       |                                                                                 |                 | Female sex                        | OR 1,7                                          |
|                                               |               |                                       |                                                                                 |                 | Age 21-50 years                   | OR 1,4-1,6                                      |
|                                               |               |                                       |                                                                                 |                 | Outpatients                       | OR 1,9                                          |
|                                               |               |                                       |                                                                                 |                 | Abdomen-Pelvis or<br>Prostate MRI | OR 1,4                                          |
|                                               |               |                                       |                                                                                 |                 | Chest or Cardiac MRI              | OR 1,5                                          |
| Jung, 2012<br><i>Immediate HR</i>             | R             | IV<br>(MRI)                           | 112 (0,08%)                                                                     | No<br>controls  | Gadobenate                        | OR 3,00                                         |
|                                               |               |                                       |                                                                                 |                 | Female sex                        | OR 1,69                                         |
|                                               |               |                                       |                                                                                 |                 | History of allergies/asthma       | OR 2,83                                         |
|                                               |               |                                       |                                                                                 |                 | Recurrence after prior HR         | 30%                                             |

| Adverse Drug Reactions                |   |             |                                          |                |                             |       |
|---------------------------------------|---|-------------|------------------------------------------|----------------|-----------------------------|-------|
| Granata, 2016<br><i>Immediate ADR</i> | R | IV<br>(MRI) | 32 (0,30%)<br>1785 with<br>premedication | No<br>controls | Gadobenate                  | 0,50% |
| Aran, 2015<br><i>All ADR</i>          | R | IV<br>(MRI) | 204 (0,1%)                               | No<br>controls | Gadofosveset meglumine      | 0,8%  |
|                                       |   |             |                                          |                | Gadoxetate disodium         | 0,31% |
|                                       |   |             |                                          |                | Gadobenate                  | 0,22% |
|                                       |   |             |                                          |                | Female sex                  | 0,13% |
|                                       |   |             |                                          |                | Outpatients                 | 0,17% |
| Bruder, 2015<br><i>Acute ADR</i>      | R | IV<br>(MRI) | 45 (0,12%)                               | No<br>controls | Gadobenate                  | 0,42% |
|                                       |   |             |                                          |                | MRI for viability in CAD    | 0,22% |
| Nelson, 1995<br><i>All ADR</i>        | R | IV<br>(MRI) | 372 (2,4%)                               | No<br>controls | History of allergies/asthma | 3,7%  |
|                                       |   |             |                                          |                | Previous HR to GBCA         | 21,3% |
|                                       |   |             |                                          |                | Previous HR to ICM          | 6,3%  |

**Abbreviations:**

*ADR = adverse drug reactions; CAD = coronary artery disease; GBCA = gadolinium-based contrast agent; HR = hypersensitivity reactions; ICM = iodine-based contrast medium; IV = intravenous; MRI = magnetic resonance imaging; OR = Odds Ratio; R = Radiology*

## References

- Fukushima Y, Ozaki D, Taketomi-Takahashi A, et al (2024) Assessment of first-time and repeated acute adverse reactions to gadolinium-based contrast agents in MRI: A retrospective study. *Eur J Radiol* 176: 111504. DOI: 10.1016/j.ejrad.2024.111504.
- Ahn YH, Kang DY, Park SB, et al (2022) Allergic-like hypersensitivity reactions to gadolinium-based contrast agents: An 8-year cohort study of 154,539 patients. *Radiology* 303: 329-336. DOI: 10.1148/radiol.210545.
- McDonald JS, Hunt CH, Kolbe AB, et al (2019) Acute adverse events following gadolinium-based contrast agent administration: A single-center retrospective study of 281,945 injections. *Radiology* 292: 620-627. DOI: 10.1148/radiol.2019182834.
- Jung JW, Kang HR, Kim MH, et al (2012) Immediate hypersensitivity reaction to gadolinium-based MR contrast media. *Radiology* 264: 414-422. DOI: 10.1148/radiol.12112025.
- Granata V, Cascella M, Fusco R, et al (2016) Immediate adverse reactions to gadolinium-based MR contrast media: A retrospective analysis on 10,608 examinations. *Biomed Res Int* 2016: 3918292. DOI: 10.1155/2016/3918292.
- Aran S, Shaqdan KW, Abujudeh HH (2015) Adverse allergic reactions to linear ionic gadolinium-based contrast agents: Experience with 194,400 injections. *Clin Radiol* 70: 466-475. DOI: 10.1016/j.crad.2014.12.011.
- Bruder O, Schneider S, Pilz G, et al (2015) 2015 Update on acute adverse reactions to gadolinium-based contrast agents in cardiovascular MR. Large multi-national and multi-ethnic population experience with 37788 patients from the EuroCMR Registry. *J Cardiovasc Magn Reson* 17: 58. DOI: 10.1186/s12968-015-0168-3.
- Nelson KL, Gifford LM, Lauber-Huber C, Gross CA, Lasser TA (1995) Clinical safety of gadopentetate dimeglumine. *Radiology* 196: 439-443.

## Online Supplement 4:

### EXAMPLE OF A LETTER FOR THE PATIENT TO TAKE TO THE ALLERGY CONSULTATION

Dear Colleague,

(Insert patient's name and details) had a hypersensitivity reaction after the administration of a contrast agent on (insert location and date).

Examination type (e.g., Angiography, CT, MRI, US, Fluoroscopy):

Type of contrast agent:

- Iodine-based
- Gadolinium-based
- Ultrasound

Name of the specific contrast agent:

Concentration:

Volume administered: (xxx) ml

Route of administration (e.g., IV, IA, intra-articular, oral, rectal, local.....):

Time between the injection and the start of the clinical symptoms:

Type of symptoms and their evolution (describe):

**Modified Ring-Messmer classification of systemic reactions**

| Grade | Skin                                     | Abdomen                | Airways                                      | Cardiovascular                                                                                      |
|-------|------------------------------------------|------------------------|----------------------------------------------|-----------------------------------------------------------------------------------------------------|
| I     | Itch<br>Flush<br>Urticaria<br>Angioedema | -                      | -                                            | -                                                                                                   |
| II    | Itch<br>Flush<br>Urticaria<br>Angioedema | Nausea<br>Cramps       | Rhinorrhoea<br>Hoarseness<br>Dyspnoea        | Tachycardia (>20 bpm rise)<br>Hypotension (>20 mm Hg drop in systolic blood pressure)<br>Arrhythmia |
| III   | Itch<br>Flush<br>Urticaria<br>Angioedema | Vomiting<br>Defecation | Laryngeal oedema<br>Bronchospasm<br>Cyanosis | Shock                                                                                               |
| IV    | Itch<br>Flush<br>Urticaria<br>Angioedema | Vomiting<br>Defecation | Respiratory arrest                           | Cardiac arrest                                                                                      |

*Classification according to the most severe symptom, no symptom is mandatory*

Treatment given during the reaction: • (please specify)

Outcome (e.g., follow up, return home, hospital admission, ICU,.....):

Tryptase performed at the time of the reaction: Yes/No

Tryptase performed 2h after start of the reaction: Yes/No

Results: ug/ml

Previous history of contrast agent reaction: Yes/No

If yes, please specify location, date, name and type of contrast agent and symptoms:

Thank you for seeing the patient and performing an allergic study to categorize the reaction as either allergic or non-allergic hypersensitivity, and to look for cross-reactivity so that a safer contrast agent can be recommended for future injections.

Yours sincerely,

Dr (Name and details)
